# Supplementary material
Source: publisher site journal article supplement (https://www.dovepress.com/article/549504)
Supplement: Supplementary file 1 [file 549504%20Supplementary%20table%20S1.docx]

**Supplementary Table S1 –** Search strategy for databases

**PubMed**

| Search | Query |
| --- | --- |
| #1 | ("puerperal depression"[Mesh] OR "puerperal depression"[Title/Abstract] OR "postnatal depression"[Mesh] OR "postnatal depression"[Title/Abstract] OR "postpartum depression"[Mesh] OR "postpartum depression"[Title/Abstract] OR "puerperium depression"[Title/Abstract]) |
| #2 | ("psychosocial"[Mesh] OR "psychosocial"[Title/Abstract] OR "Psychology"[Mesh] OR "Psycholog*"[Title/Abstract] OR "Psychoeducation"[Mesh] OR "Psychoeduc*"[Title/Abstract]) |
| #3 | ("cognitive behavioral therapy"[Mesh] OR "cognitive behavioural therapy"[Title/Abstract] OR "cognitive behavioral therapy"[Title/Abstract] OR "CBT"[Title/Abstract]) |
| #4 | ("interpersonal psychotherapy"[Mesh] OR "interpersonal therapy"[Title/Abstract] OR "interpersonal psychotherapy"[Title/Abstract] OR "IPT"[Title/Abstract]) |
| #5 | ("psychotherapy”[Mesh] OR “psychodynamic"[Mesh] OR "psychodynamic"[Title/Abstract]) |
| #6 | ("counseling"[Mesh] OR "counsel*"[Title/Abstract]) |
| #7 | ("peer group"[Mesh] OR "peer support"[Title/Abstract] OR "social support"[Mesh] OR "partner support"[Title/Abstract]) |
| #8 | (#2 OR #3 OR #4 OR #5 OR #6 OR #7) |
| #9 | ("exercise therapy"[Mesh] OR "kinesitherapy"[Title/Abstract] OR "aerobic exercise"[Mesh] OR "aerobic"[Title/Abstract] OR "exercise"[Mesh] OR "exercise"[Title/Abstract]) |
| #10 | ("motor activity"[Mesh] OR "motor activity"[Title/Abstract] OR "yoga"[Mesh] OR "yoga"[Title/Abstract]) |
| #11 | (#9 OR #10) |
| #12 | ("music therapy"[Mesh] OR "music"[Title/Abstract] OR "rhythm*"[Title/Abstract] OR "melod*"[Title/Abstract] OR "compose"[Title/Abstract] OR "audio"[Title/Abstract]) |
| #13 | ("acupuncture therapy"[Mesh] OR "needle"[Title/Abstract] OR "acupuncture"[Title/Abstract] OR "auriculoacupuncture"[Title/Abstract] OR "electroacupuncture"[Title/Abstract]) |
| #14 | ("randomized controlled trial"[Publication Type] OR "randomized controlled trial"[Title/Abstract] OR "controlled clinical trial"[Publication Type] OR "controlled clinical trial"[Title/Abstract]) |
| #15 | (#1 AND (#8 OR #11 OR #12 OR #13) AND #14) |
| Returned **800** articles | |

**The Cochrane Library**

| Search | Query |
| --- | --- |
| #1 | MeSH descriptor: [Depression, Postpartum] explode all trees OR ("puerperal depression":ti,ab,kw OR "postnatal depression":ti,ab,kw OR "postpartum depression":ti,ab,kw OR "puerperium depression":ti,ab,kw) |
| #2 | MeSH descriptor: [Psychology] explode all trees OR MeSH descriptor: [Psychosocial Support Systems] explode all trees OR ("psychosocial":ti,ab,kw OR "psycholog*":ti,ab,kw OR "psychoeduc*":ti,ab,kw) |
| #3 | MeSH descriptor: [Cognitive Behavioral Therapy] explode all trees OR ("cognitive behavioral therapy":ti,ab,kw OR "cognitive behavioural therapy":ti,ab,kw OR "CBT":ti,ab,kw) |
| #4 | MeSH descriptor: [Interpersonal Psychotherapy] explode all trees OR ("interpersonal psychotherapy":ti,ab,kw OR "interpersonal therapy":ti,ab,kw OR "IPT":ti,ab,kw) |
| #5 | MeSH descriptor: [Psychotherapy] explode all trees OR MeSH descriptor: [Psychotherapy, Psychodynamic] explode all trees OR ("psychotherapy":ti,ab,kw OR "psychodynamic":ti,ab,kw) |
| #6 | MeSH descriptor: [Counseling] explode all trees OR ("counsel*":ti,ab,kw) |
| #7 | MeSH descriptor: [Peer Group] explode all trees OR MeSH descriptor: [Social Support] explode all trees OR ("peer support":ti,ab,kw OR "partner support":ti,ab,kw) |
| #8 | #2 OR #3 OR #4 OR #5 OR #6 OR #7 |
| #9 | MeSH descriptor: [Exercise Therapy] explode all trees OR MeSH descriptor: [Aerobic Exercise] explode all trees OR ("exercise therapy":ti,ab,kw OR "kinesitherapy":ti,ab,kw OR "aerobic":ti,ab,kw OR "exercise":ti,ab,kw) |
| #10 | MeSH descriptor: [Motor Activity] explode all trees OR MeSH descriptor: [Yoga] explode all trees OR ("motor activity":ti,ab,kw OR "yoga":ti,ab,kw) |
| #11 | #9 OR #10 |
| #12 | MeSH descriptor: [Music Therapy] explode all trees OR ("music therapy":ti,ab,kw OR "music":ti,ab,kw OR "rhythm*":ti,ab,kw OR "melod*":ti,ab,kw) |
| #13 | MeSH descriptor: [Acupuncture Therapy] explode all trees OR ("acupuncture therapy":ti,ab,kw OR "needle":ti,ab,kw OR "auriculoacupuncture":ti,ab,kw OR "electroacupuncture":ti,ab,kw) |
| #15 | #1 AND (#8 OR #11 OR #12 OR #13) |
| Returned **414** articles | |

**Web of science**

| Search | Query |
| --- | --- |
| #1 | TS=("puerperal depression" OR "postnatal depression" OR "postpartum depression" OR "puerperium depression") |
| #2 | TS=("psychosocial" OR "psycholog*" OR "psychoeduc*") |
| #3 | TS=("cognitive behavioral therapy" OR "cognitive behavioural therapy" OR "CBT") |
| #4 | TS=("interpersonal psychotherapy" OR "interpersonal therapy" OR "IPT") |
| #5 | TS=("psychotherapy" OR "psychodynamic") |
| #6 | TS=("counseling" OR "counsel*") |
| #7 | TS=("peer group" OR "peer support" OR "social support" OR "partner support") |
| #8 | #2 OR #3 OR #4 OR #5 OR #6 OR #7 |
| #9 | TS=("exercise therapy" OR "kinesitherapy" OR "aerobic exercise" OR "aerobic" OR "exercise") |
| #10 | TS=("motor activity" OR "yoga") |
| #11 | #9 OR #10 |
| #12 | TS=("music therapy" OR "music" OR "rhythm*" OR "melod*" OR "compose" OR "audio") |
| #13 | TS=("acupuncture therapy" OR "needle" OR "acupuncture" OR "auriculoacupuncture" OR "electroacupuncture") |
| #14 | TS=("randomized controlled trial" OR "controlled clinical trial") |
| #15 | #1 AND (#8 OR #11 OR #12 OR #13) AND #14 |
| Returned **845** articles | |

**EMBASE**

| Search | Query |
| --- | --- |
| #1 | 'puerperal depression'/exp OR 'postnatal depression'/exp OR 'postpartum depression'/exp OR ('puerperal depression' OR 'postnatal depression' OR 'postpartum depression' OR 'puerperium depression'):ti,ab,kw |
| #2 | 'psychosocial care'/exp OR 'psychology'/exp OR ('psychosocial' OR 'psycholog' OR 'psychoeduc'):ti,ab,kw |
| #3 | 'cognitive behavioral therapy'/exp OR ('cognitive behavioral therapy' OR 'cognitive behavioural therapy' OR 'CBT'):ti,ab,kw |
| #4 | 'interpersonal psychotherapy'/exp OR ('interpersonal psychotherapy' OR 'interpersonal therapy' OR 'IPT'):ti,ab,kw |
| #5 | 'psychotherapy'/exp OR 'psychodynamic psychotherapy'/exp OR ('psychotherapy' OR 'psychodynamic'):ti,ab,kw |
| #6 | 'counseling'/exp OR ('counsel*'):ti,ab,kw |
| #7 | 'peer group'/exp OR 'social support'/exp OR ('peer support' OR 'partner support'):ti,ab,kw |
| #8 | #2 OR #3 OR #4 OR #5 OR #6 OR #7 |
| #9 | 'exercise therapy'/exp OR 'aerobic exercise'/exp OR ('exercise therapy' OR 'kinesitherapy' OR 'aerobic exercise' OR 'aerobic' OR 'exercise'):ti,ab,kw |
| #10 | 'motor activity'/exp OR 'yoga'/exp OR ('motor activity' OR 'yoga'):ti,ab,kw |
| #11 | #9 OR #10 |
| #12 | 'music therapy'/exp OR ('music therapy' OR 'music' OR 'rhythm' OR 'melod' OR 'compose' OR 'audio'):ti,ab,kw |
| #13 | 'acupuncture'/exp OR ('acupuncture therapy' OR 'needle' OR 'acupuncture' OR 'auriculoacupuncture' OR 'electroacupuncture'):ti,ab,kw |
| #14 | 'randomized controlled trial'/exp OR ('randomized controlled trial' OR 'randomised controlled trial' OR 'RCT' OR 'controlled clinical trial'):ti,ab,kw |
| #15 | #1 AND (#8 OR #11 OR #12 OR #13) AND #14 |
| Returned **19** articles | |

**Scopus**

| Search | Query |
| --- | --- |
| #1 | TITLE-ABS-KEY("puerperal depression" OR "postnatal depression" OR "postpartum depression" OR "puerperium depression") |
| #2 | TITLE-ABS-KEY("psychosocial" OR "psycholog*" OR "psychoeduc*") |
| #3 | TITLE-ABS-KEY("cognitive behavioral therapy" OR "cognitive behavioural therapy" OR "CBT") |
| #4 | TITLE-ABS-KEY("interpersonal psychotherapy" OR "interpersonal therapy" OR "IPT") |
| #5 | TITLE-ABS-KEY("psychotherapy" OR "psychodynamic") |
| #6 | TITLE-ABS-KEY("counseling" OR "counsel*") |
| #7 | TITLE-ABS-KEY("peer group" OR "peer support" OR "social support" OR "partner support") |
| #8 | #2 OR #3 OR #4 OR #5 OR #6 OR #7 |
| #9 | TITLE-ABS-KEY("exercise therapy" OR "kinesitherapy" OR "aerobic exercise" OR "aerobic" OR "exercise") |
| #10 | TITLE-ABS-KEY("motor activity" OR "yoga") |
| #11 | #9 OR #10 |
| #12 | TITLE-ABS-KEY("music therapy" OR "music" OR "rhythm*" OR "melod*" OR "compose" OR "audio") |
| #13 | TS=("acupuncture therapy" OR "needle" OR "acupuncture" OR "auriculoacupuncture" OR "electroacupuncture") |
| #14 | TITLE-ABS-KEY("randomized controlled trial" OR "controlled clinical trial") |
| #15 | #1 AND (#8 OR #11 OR #12 OR #13) AND #14 |
| Returned **130** articles | |

**CNKI**

| Search | Query |
| --- | --- |
| #1 | 主题(Topic) = 产后抑郁症(Puerperal depression) OR 产褥期抑郁(Puerperium depression) |
| #2 | 主题(Topic) =心理治疗 (Psychotherapy) OR 认知行为治疗(Cognitive Behavioral Therapy) OR 社会支持(social support) OR 同伴支持(peer support) |
| #3 | 主题(Topic) =运动疗法 (Exercise Therapy) OR 有氧运动(Aerobic exercise) OR 瑜伽(Yoga) |
| #4 | 主题(Topic) =音乐(Music) OR 音频(audio) |
| #5 | 主题(Topic) =针灸(Acupuncture) OR 电针(Electroacupuncture) OR 耳针(Auriculoacupuncture) |
| #6 | 主题(Topic) = 随机对照试验(Randomized controlled trial) OR 临床对照实验(Controlled clinical trial) |
| #7 | #1 AND (#2 OR #3 OR #4 OR #5) AND #6 |
| Returned **507** articles | |

**VIP database**

| Search | Query |
| --- | --- |
| #1 | 主题(Topic) = 产后抑郁症(Puerperal depression) OR 产褥期抑郁(Puerperium depression) |
| #2 | 主题(Topic) =心理治疗 (Psychotherapy) OR 认知行为治疗(Cognitive Behavioral Therapy) OR 社会支持(social support) OR 同伴支持(peer support) |
| #3 | 主题(Topic) =运动疗法 (Exercise Therapy) OR 有氧运动(Aerobic exercise) OR 瑜伽(Yoga) |
| #4 | 主题(Topic) =音乐(Music) OR 音频(audio) |
| #5 | 主题(Topic) =针灸(Acupuncture) OR 电针(Electroacupuncture) OR 耳针(Auriculoacupuncture) |
| #6 | 主题(Topic) = 随机对照试验(Randomized controlled trial) OR 临床对照实验(Controlled clinical trial) |
| #7 | #1 AND (#2 OR #3 OR #4 OR #5) AND #6 |
| Returned **73** articles | |

**Wanfang database**

| Search | Query |
| --- | --- |
| #1 | 主题(Topic) = 产后抑郁症(Puerperal depression) OR 产褥期抑郁(Puerperium depression) |
| #2 | 主题(Topic) =心理治疗 (Psychotherapy) OR 认知行为治疗(Cognitive Behavioral Therapy) OR 社会支持(social support) OR 同伴支持(peer support) |
| #3 | 主题(Topic) =运动疗法 (Exercise Therapy) OR 有氧运动(Aerobic exercise) OR 瑜伽(Yoga) |
| #4 | 主题(Topic) =音乐(Music) OR 音频(audio) |
| #5 | 主题(Topic) =针灸(Acupuncture) OR 电针(Electroacupuncture) OR 耳针(Auriculoacupuncture) |
| #6 | 主题(Topic) = 随机对照试验(Randomized controlled trial) OR 临床对照实验(Controlled clinical trial) |
| #7 | #1 AND (#2 OR #3 OR #4 OR #5) AND #6 |
| Returned **16** articles | |
