# Supplementary material
Source: publisher site journal article supplement (https://www.dovepress.com/article/549504)
Supplement: Supplementary file 2 [file 549504%20Supplementary%20table%20S2.docx]

**Supplementary table S2**

Description of included studies.

| **Study** | **Country** | **Interventions/Comparisons** | **Sample size** | **Age** | **Intervention Period** | | | **Outcome** |
| --- | --- | --- | --- | --- | --- | --- | --- | --- |
| **Session** | **Time/week** | **Total duration** | **reported** |
| Armstrong et al.  2003 | Australia | Exercise + Psychotherapy | 10 | 21.0–30.0 | 30-40min | 3 | 12 weeks | EPDS, DASS |
| Control | 10 |
| Armstrong et al.  2004 | Australia | Exercise | 9 | ≤29 7  ≥30 12 | N/A | 2 | 12 weeks | EPDS |
| Control | 10 |
| Buttner et al.,  2015 | United States | Exercise | 28 | 29.8±5.2 | 60min | 2 | 8 weeks | HDRS, IDAS |
| Control | 29 | 32.5±4.8 |
| Chabrol et al.,  2002 | France | Psychotherapy | 18 | 30.5±4.3 | 60min | N/A | 5-8 weeks | EPDS, HDRS, BDI |
| Control | 30 | 30.0±5.0 |
| Chen et al.,  2000 | China | Psychotherapy | 30 | 29.1±4.2 | 90-120min | 1 | 4 weeks | BDI |
| Control | 30 |
| Chen et al.,  2019 | China | Acupuncture | 32 | 31.0±5.1 | 30min | 2 | 5 weeks | EPDS, HAMD, SDS |
| Psychotherapy | 33 | 29.3±5.3 |
| Chung et al.,  2012 | China | Acupuncture | 35 | 26.3±4.3 | 30min | 2 | 4 weeks | EPDS, HDRS, SDS |
| Control | 34 | 42.6±7.2 |

**Supplementary table S2**

Description of included studies (continued).

| **Study** | **Country** | **Interventions/Comparisons** | **Sample size** | **Age** | **Intervention Period** | | | **Outcome** |
| --- | --- | --- | --- | --- | --- | --- | --- | --- |
| **Session** | **Time/week** | **Total duration** | **reported** |
| Daley et al.,  2015 | United Kingdom | Exercise | 43 | 31.7±5.3 | 30min | 3 | 12 weeks | EPDS |
| Control | 42 | 29.3±5.7 |
| Dennis et al.  2009 | Canada | Psychotherapy | 349 | ＜20  20-34  ≥35 | N/A | N/A | 12 weeks | EPDS |
| Control | 352 |
| Dennis et al.  2020 | Canada | Psychotherapy | 120 | ＜25  26-34  ＞35 | 60min/week | | 12 weeks | EPDS, STAI |
| Control | 121 |
| Forsyth et al.,  2017 | United Kingdom | Exercise | 11 | 27.0±5.5 | 60min | 3 | 24 weeks | EPDS |
| Control | 11 | 25.0±5.1 |
| Gui et al.,  2020 | China | Exercise+ Psychotherapy | 47 | 29.7±4.4 | N/A | N/A | 6 weeks | EPDS, SDS |
| Psychotherapy | 47 | 29.4±4.3 |
| Guo et al.,  2017 | China | Psychotherapy | 40 | 31.5±3.7 | 60min | 2 | 12 weeks | EPDS |
| Control | 40 | 29.1±4.3 |

**Supplementary table S2**

Description of included studies (continued).

| **Study** | **Country** | **Interventions/Comparisons** | **Sample size** | **Age** | **Intervention Period** | | | **Outcome** |
| --- | --- | --- | --- | --- | --- | --- | --- | --- |
| **Session** | **Time/week** | **Total duration** | **reported** |
| Gjerdingen et al.,  2013 | United States | Psychotherapy | 13 | 28.1±3.7 | 4h/week | | 6 weeks | BDI |
| Control | 14 | 32.1±7.6 |
| Heh et al.,  2008 | China | Exercise | 33 | 20.0-35.0 | 60min | 3 | 12 weeks | EPDS |
| Control | 30 |
| Hou et al,  2012 | China | Psychotherapy | 104 | 19.0-40.0 | 60min | 1 | 13 weeks | EPDS |
| Control | 109 |
| Jannati et al.,  2020 | Iran | Psychotherapy | 38 | 20-24  25-29  30-34  35-40 | 45-60min | 1 | 8 weeks | EDPS, HAMD |
| Control | 37 |
| Li et al.  2019 | China | Exercise + Psychotherapy | 50 | 26.2±6.3 | 60min | 2 | 8 weeks | EPDS, SAS |
| Psychotherapy | 50 | 26.7±5.4 |
| Li et al,  2019 | China | Music | 21 | 30.3±3.9 | 30min | 7 | 8 weeks | EPDS |
| Control | 20 | 30.0±3.9 |
| Li et al,  2020 | China | Exercise + Psychotherapy | 41 | 31.5±1.2 | N/A | 1 | 6 weeks | EPDS |
| Psychotherapy | 41 | 31.4±1.2 |

**Supplementary table S2**

Description of included studies (continued).

| **Study** | **Country** | **Interventions/Comparisons** | **Sample size** | **Age** | **Intervention Period** | | | **Outcome** |
| --- | --- | --- | --- | --- | --- | --- | --- | --- |
| **Session** | **Time/week** | **Total duration** | **reported** |
| Liu et al.  2022 | China | Psychotherapy | 65 | 30.3±5.2 | N/A | N/A | 8 weeks | EPDS |
| Control | 65 | 33.3±5.2 |
| Milgrom et al.,  2005 | Australia | Psychotherapy | 159 | 29.7±5.4 | 90min/week | | 12 weeks | BDI, BAI |
| Control | 33 |
| Milgrom et al.,  2016 | Australia | Psychotherapy | 21 | 31.7±4.6 | N/A | N/A | 12 weeks | BDI, DASS |
| Control | 22 | 31.5±4.3 |
| Ngai et al.,  2015 | China | Psychotherapy | 197 | 31.1±3.8 | N/A | 1 | 5 weeks | BDI, DASS |
| Control | 200 | 30.4±4.4 |
| Norman et al.,  2010 | Australia | Exercise + Psychotherapy | 62 | 29..3±4.0 | 90min/week | | 8 weeks | EPDS |
| Psychotherapy | 73 | 30.1±5.3 |
| O'Hara et al.,  2000 | United States | Psychotherapy | 40 | 29..4±4.9 | 60min | 1 | 12 weeks | BDI, HRSD, SAS |
| Control | 40 | 29.7±4.5 |
| Özkan et al.,  2020 | Turkey | Exercise | 40 | 28.9±4.8 | 30min | 5 | 4 weeks | EPDS |
| Control | 40 |

**Supplementary table S2**

Description of included studies (continued).

| **Study** | **Country** | **Interventions/Comparisons** | **Sample size** | **Age** | **Intervention Period** | | | **Outcome** |
| --- | --- | --- | --- | --- | --- | --- | --- | --- |
| **Session** | **Time/week** | **Total duration** | **reported** |
| Perkins et al.  2023 | United States | Music | 65 | 26-45 | 60min | 1 | 6 weeks | EPDS |
| Control | 65 |
| Ribeiro et al,  2018 | Brazil | Music | 10 | 25.8±4.5 | 30-45min | 1 | 7weeks | BDI, BAI |
| Control | 11 | 26.2±7.1 |
| Seo et al.,  2023 | Korea | Psychotherapy | 37 | ＜30  30-34  ≥35 | 90min/week | | 12 weeks | EPDS |
| Control | 36 |
| Sjömark et al.,  2022 | Sweden | Psychotherapy | 132 | 31.6±4.4 | N/A | N/A | 12 weeks | BDI, DASS |
| Control | 134 | 31.9±4.6 |
| Wang et al,  2018 | China | Music | 60 | 32.5±4.1 | 30-60min | 7 | 8 weeks | EPDS |
| Psychotherapy | 60 | 32.0±4.0 |
| Xu et al,  2010 | China | Acupuncture | 35 | 20-45 | 30min | 5 | 6weeks | EDPS, HAMD |
| Control | 35 |
| Yang et al,  2021 | China | Acupuncture | 54 | 34.9±4.1 | 30min | 3 | 8weeks | HAMD |
| Control | 34 | 33.1±4.2 |

**Supplementary table S2**

Description of included studies (continued).

| **Study** | **Country** | **Interventions/Comparisons** | **Sample size** | **Age** | **Intervention Period** | | | **Outcome** |
| --- | --- | --- | --- | --- | --- | --- | --- | --- |
| **Session** | **Time/week** | **Total duration** | **reported** |
| Zhang et al,  2017 | China | Acupuncture | 30 | 28.2±3.9 | 30min | 6 | 4weeks | EPDS, SDS, SAS |
| Psychotherapy | 30 | 28.1±3.5 | 60min | 4 |

**Note:** EPDS= Edinburgh Postnatal Depression Scale; DASS= Depression, Anxiety, and Stress Scale; HDRS= Hamilton Depression Rating Scale; BDI= Beck Depression Inventory; IDAS= Inventory of Depressive Symptoms; HAMD= Hamilton Depression Rating Scale; SDS= Self-Rating Depression Scale; HDRS= Hamilton Depression Rating Scale; STAI= State-Trait Anxiety Inventory; SAS= Self-Rating Anxiety Scale; BAI = Beck Anxiety Inventory.
